# Supplementary material for: α-Na2Ni2Fe(PO4)3: a dual positive/negative electrode material for sodium ion batteries
Source: Royal Society of Chemistry journal article supplement (doi:10.1039/c5dt00021a), 2015-01-01
Supplement: c5dt00021a1.pdf [file c5dt00021a1.pdf]

## Supplementary Information

# $\alpha$ -Na<sub>2</sub>Ni<sub>2</sub>Fe(PO<sub>4</sub>)<sub>3</sub>: a Dual Positive/Negative Electrode Material for Sodium Ion Batteries

Cite this: DOI: 10.1039/x0xx00000x

R. Essehli,<sup>a,\*</sup> I. Belharouak,<sup>a,\*</sup> H. Ben Yahia,<sup>a</sup> R. Chamoun,<sup>a</sup> B. Orayech,<sup>b</sup> B. El Bali,<sup>c</sup> K. Bouziane,<sup>d</sup> X. Zhou,<sup>e</sup> and Z. Zhen<sup>e</sup>

Received 00th January 2012,

Accepted 00th January 2012

DOI: 10.1039/x0xx00000x

[www.rsc.org/](http://www.rsc.org/)

# Supplementary Information

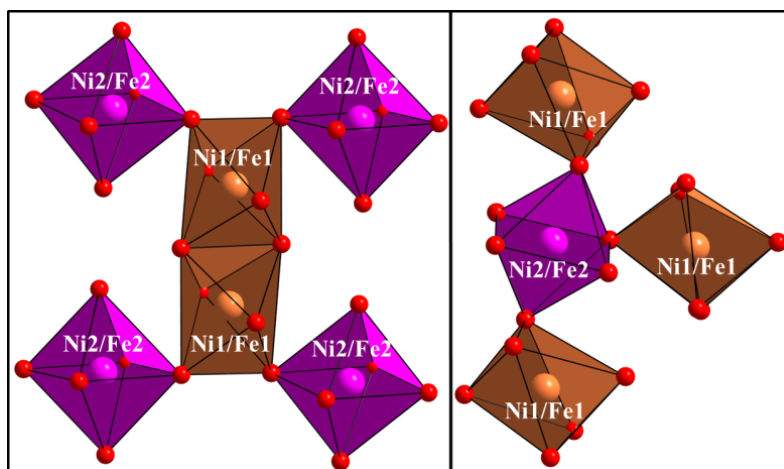

Fig. S1. Connectivity between the  $[(\text{Ni}2/\text{Fe}1)\text{O}_6]$  and  $[(\text{Ni}2/\text{Fe}2)\text{O}_6]$  octahedra in  $\alpha\text{-Na}_2\text{Ni}_2\text{Fe}(\text{PO}_4)_3$ .

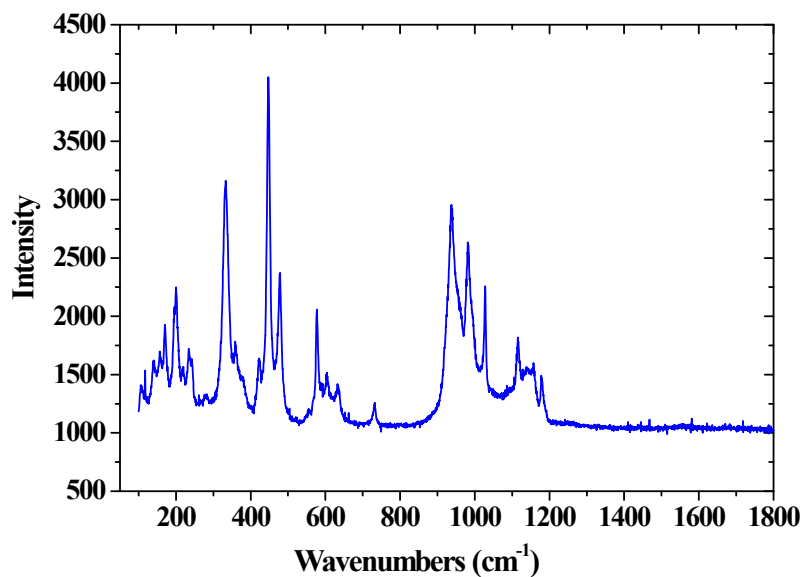

Fig. S2. Raman spectra of  $\alpha\text{-Na}_2\text{Ni}_2\text{Fe}(\text{PO}_4)_3$ .

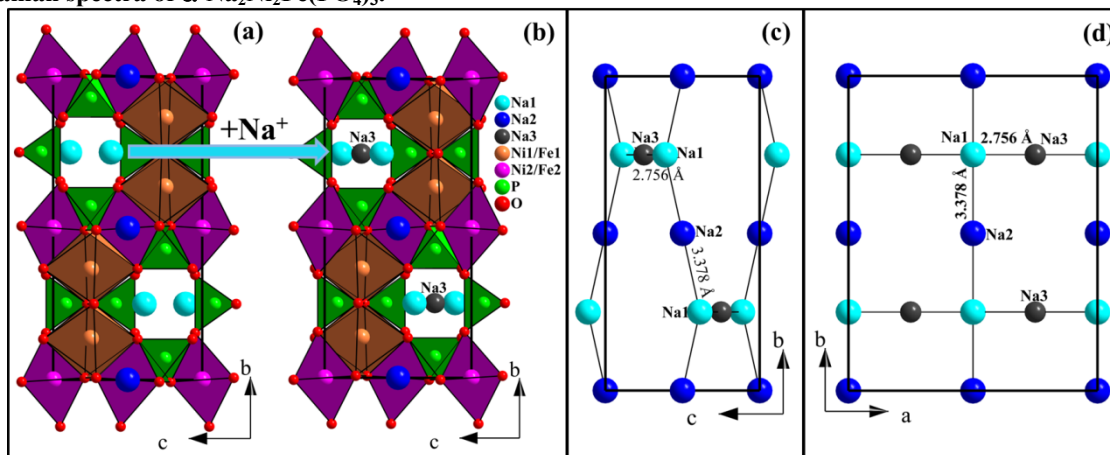

Fig. S3. Theoretical intercalation mechanism of one sodium atoms into  $\alpha\text{-Na}_2\text{Ni}_2\text{Fe}(\text{PO}_4)_3$ .
